# Supplementary material
Source: PubMed Central journal article supplement (PMC5134910)
Supplement: NIHMS824615-supplement-Supplement.pdf [file NIHMS824615-supplement-Supplement.pdf]

## SUPPLEMENTAL MATERIAL

This supplement contains two sets of analyses from phase 2 of The Intravascular Cooling in the Treatment of Stroke 2/3 (ICTuS 2/3) trial. The report is based on data locked by informatics as of May 15, 2015. For each analysis we present the ITT followed by the PP sample. These analyses were requested by reviewers at STROKE journal.

### Summary of Adverse Events

This section presents the Safety report summary, including adverse events and deaths.

Frequency and percentages of AE's, SAE's and Deaths are reported by treatment group and overall.

Comparisons were performed using Fisher's exact test.

Table I. Adverse Events in the ITT Sample

|                                                                | NORMOTHERMIA | HYPOTHERMIA | Overall |
|----------------------------------------------------------------|--------------|-------------|---------|
| Number of subjects randomized                                  | 57           | 63          | 120     |
| Number of AE events                                            | 307          | 456         | 763     |
| Number of randomized subjects who experienced at least one AE* | 53           | 63          | 116     |
| Percent of randomized subjects who experienced at least one AE | 92.98%       | 100%        | 96.67%  |

\*Fisher's Exact Test p-value: 0.0481

Table II. Serious Adverse Events in the ITT sample

|                                                                 | NORMOTHERMIA | HYPOTHERMIA | Overall |
|-----------------------------------------------------------------|--------------|-------------|---------|
| Number of subjects randomized                                   | 57           | 63          | 120     |
| Number of SAE events                                            | 31           | 35          | 66      |
| Number of randomized subjects who experienced at least one SAE* | 20           | 26          | 46      |
| Percent of randomized subjects who experienced at least one SAE | 35.09%       | 41.27%      | 38.33%  |

\*Odds Ratio: 1.297 (0.582,2.917) Fisher's Exact Test p-value: 0.5737

Table III. Deaths in the ITT sample.

|       | NORMOTHERMIA | %     | HYPOTHERMIA | %     | Total | %     |
|-------|--------------|-------|-------------|-------|-------|-------|
| No    | 52           | 91.2  | 53          | 84.1  | 105   | 87.5  |
| Yes   | 5            | 8.8   | 10          | 15.9  | 15    | 12.5  |
| Total | 57           | 100.0 | 63          | 100.0 | 120   | 100.0 |

Odds Ratio: 1.952 (0.561,7.792) Fisher's Exact Test p-value: 0.2795

Table IV. Adverse Events in PP Sample

|                                                                | NORMOTHERMIA | HYPOTHERMIA | Overall |
|----------------------------------------------------------------|--------------|-------------|---------|
| Number of subjects randomized                                  | 49           | 51          | 100     |
| Number of AE events                                            | 250          | 398         | 648     |
| Number of randomized subjects who experienced at least one AE* | 45           | 51          | 96      |
| Percent of randomized subjects who experienced at least one AE | 91.84%       | 100%        | 96%     |

\*Fisher's Exact Test p-value: 0.054

Table V. Serious Adverse Events in the PP Sample

|                                                                 | NORMOTHERMIA | HYPOTHERMIA | Overall |
|-----------------------------------------------------------------|--------------|-------------|---------|
| Number of subjects randomized                                   | 49           | 51          | 100     |
| Number of SAE events                                            | 25           | 29          | 54      |
| Number of randomized subjects who experienced at least one SAE* | 16           | 21          | 37      |
| Percent of randomized subjects who experienced at least one SAE | 32.65%       | 41.18%      | 37%     |

\*Odds Ratio: 1.438 (0.591,3.552) Fisher's Exact Test p-value: 0.413

Table VI. Deaths in the PP Sample

|       | NORMOTHERMIA | %     | HYPOTHERMIA | %     | Total | %   |
|-------|--------------|-------|-------------|-------|-------|-----|
| No    | 44           | 89.8  | 42          | 82.4  | 86    | 86  |
| Yes   | 5            | 10.2  | 9           | 17.6  | 14    | 14  |
| Total | 49           | 100.0 | 51          | 100.0 | 100   | 100 |

Odds Ratio: 1.874 (0.514,7.729) Fisher's Exact Test p-value: 0.3896

## Multi-variable Regression

This section presents the Day 90 mRS report for phase 2 of the study The Intravascular Cooling in the Treatment of Stroke 2/3 (ICTuS 2/3). The report is based on data locked as of May 15, 2015. Note, participants who died prior to the day 90 visit had their 90 day mRS set to 6.

- Primary Analysis: Univariate dichotomized day 90 mRS (defined as 0-1 vs 2-6)

A Fisher's Exact test was used to compare the rates (defined as a 0-1 vs 2-6) in day 90 mRS between the two groups, due to sites with sparse data the analysis was not stratified by study site.

- Sensitivity Analysis: Multivariable dichotomized day 90 mRS (defined as 0-1 vs 2-6)

A multivariable logistic model was performed to study the association between outcome and treatment, adjusting for the following pre-specified known confounders: baseline NIHSS score, history of diabetes, admission glucose, age and time to treatment.

Table VIIa. Univariate 90-day full scale modified Rankin scores for the ITT sample

|       | NORMOTHERMIA |       | HYPOTHERMIA |       | Total |       |
|-------|--------------|-------|-------------|-------|-------|-------|
|       |              | %     |             | %     |       | %     |
| 0     | 4            | 7.3   | 9           | 14.3  | 13    | 11.0  |
| 1     | 17           | 30.9  | 12          | 19.0  | 29    | 24.6  |
| 2     | 4            | 7.3   | 7           | 11.1  | 11    | 9.3   |
| 3     | 7            | 12.7  | 10          | 15.9  | 17    | 14.4  |
| 4     | 14           | 25.5  | 12          | 19.0  | 26    | 22.0  |
| 5     | 4            | 7.3   | 3           | 4.8   | 7     | 5.9   |
| 6     | 5            | 9.1   | 10          | 15.9  | 15    | 12.7  |
| Total | 55           | 100.0 | 63          | 100.0 | 118   | 100.0 |

Table VIIb. Univariate 90-day dichotomized modified Rankin scores for the ITT sample

|         | NORMOTHERMIA |       | HYPOTHERMIA |       | Total |       |
|---------|--------------|-------|-------------|-------|-------|-------|
|         |              | %     |             | %     |       | %     |
| mRS 2-6 | 34           | 61.8  | 42          | 66.7  | 76    | 64.4  |
| mRS 0-1 | 21           | 38.2  | 21          | 33.3  | 42    | 35.6  |
| Total   | 55           | 100.0 | 63          | 100.0 | 118   | 100.0 |

Odds Ratio: 0.811 (0.355,1.846) Fisher's Exact Test p-value: 0.7003

Table VIII. Multi-Variable Regression of the 90-day modified Rankin scores in the ITT sample

This analysis was pre-specified in the trial statistical analysis plan. The included variables were chosen because they are known to influence 90-day outcomes (using the modified Rankin score). Note that only baseline stroke severity, as measured by the NIHSS, significantly influenced outcome.

|                | Odds Ratio | Lower 95% CI | Upper 95% CI | P-value |
|----------------|------------|--------------|--------------|---------|
| ARMHYPOTHERMIA | 0.6221     | 0.2564       | 1.5097       | 0.2941  |
| NIHSSBL        | 0.7865     | 0.7077       | 0.8742       | <0.0001 |
| AGE            | 0.9916     | 0.9509       | 1.0341       | 0.6943  |
| DMYes          | 0.7062     | 0.2278       | 2.1891       | 0.5468  |
| GLUCOSE        | 0.998      | 0.9902       | 1.0059       | 0.6212  |
| ONSTOTPA.MIN   | 0.9938     | 0.9814       | 1.0064       | 0.3365  |

Table IXa. Univariate 90-day full scale modified Rankin scores for the PP sample

|       | NORMOTHERMIA |       | HYPOTHERMIA |       | Total |       |
|-------|--------------|-------|-------------|-------|-------|-------|
|       |              | %     |             | %     |       | %     |
| 0     | 3            | 6.4   | 5           | 9.8   | 8     | 8.2   |
| 1     | 15           | 31.9  | 7           | 13.7  | 22    | 22.4  |
| 2     | 3            | 6.4   | 6           | 11.8  | 9     | 9.2   |
| 3     | 6            | 12.8  | 9           | 17.6  | 15    | 15.3  |
| 4     | 11           | 23.4  | 12          | 23.5  | 23    | 23.5  |
| 5     | 4            | 8.5   | 3           | 5.9   | 7     | 7.1   |
| 6     | 5            | 10.6  | 9           | 17.6  | 14    | 14.3  |
| Total | 47           | 100.0 | 51          | 100.0 | 98    | 100.0 |

Table IXb. Univariate 90-day dichotomized modified Rankin scores for the PP sample

|         | NORMOTHERMIA |       | HYPOTHERMIA |       | Total |       |
|---------|--------------|-------|-------------|-------|-------|-------|
|         |              | %     |             | %     |       | %     |
| mRS 2-6 | 29           | 61.7  | 39          | 76.5  | 68    | 69.4  |
| mRS 0-1 | 18           | 38.3  | 12          | 23.5  | 30    | 30.6  |
| Total   | 47           | 100.0 | 51          | 100.0 | 98    | 100.0 |

Odds Ratio: 0.499 (0.187,1.293) Fisher's Exact Test p-value: 0.1294

Decreased odds of a good outcome in the Hypothermia group.

Table X. Multi-Variable Regression of the 90-day modified Rankin scores in the PP sample

This analysis was pre-specified in the trial statistical analysis plan. The included variables were chosen because they are known to influence 90-day outcomes (using the modified Rankin score). Note that only baseline stroke severity, as measured by the NIHSS, significantly influenced outcome.

|                | Odds Ratio | Lower 95% CI | Upper 95% CI | P-value |
|----------------|------------|--------------|--------------|---------|
| ARMHYPOTHERMIA | 0.2885     | 0.0983       | 0.8471       | 0.0237  |
| NIHSSBL        | 0.7924     | 0.7023       | 0.8941       | 0.0002  |
| AGE            | 0.9890     | 0.9398       | 1.0407       | 0.6690  |
| DMYes          | 1.6408     | 0.4628       | 5.8181       | 0.4432  |
| GLUCOSE        | 0.9984     | 0.9892       | 1.0076       | 0.7282  |
| ONSTOTPA.MIN   | 0.9900     | 0.9759       | 1.0042       | 0.1638  |
